# Supplementary material
Source: PubMed Central journal article supplement (PMC3346607)
Supplement: supp_56.5.2683_AAC6486-11_ST1-ST2.pdf [file supp_56.5.2683_AAC6486-11_ST1-ST2.pdf]

Supplement

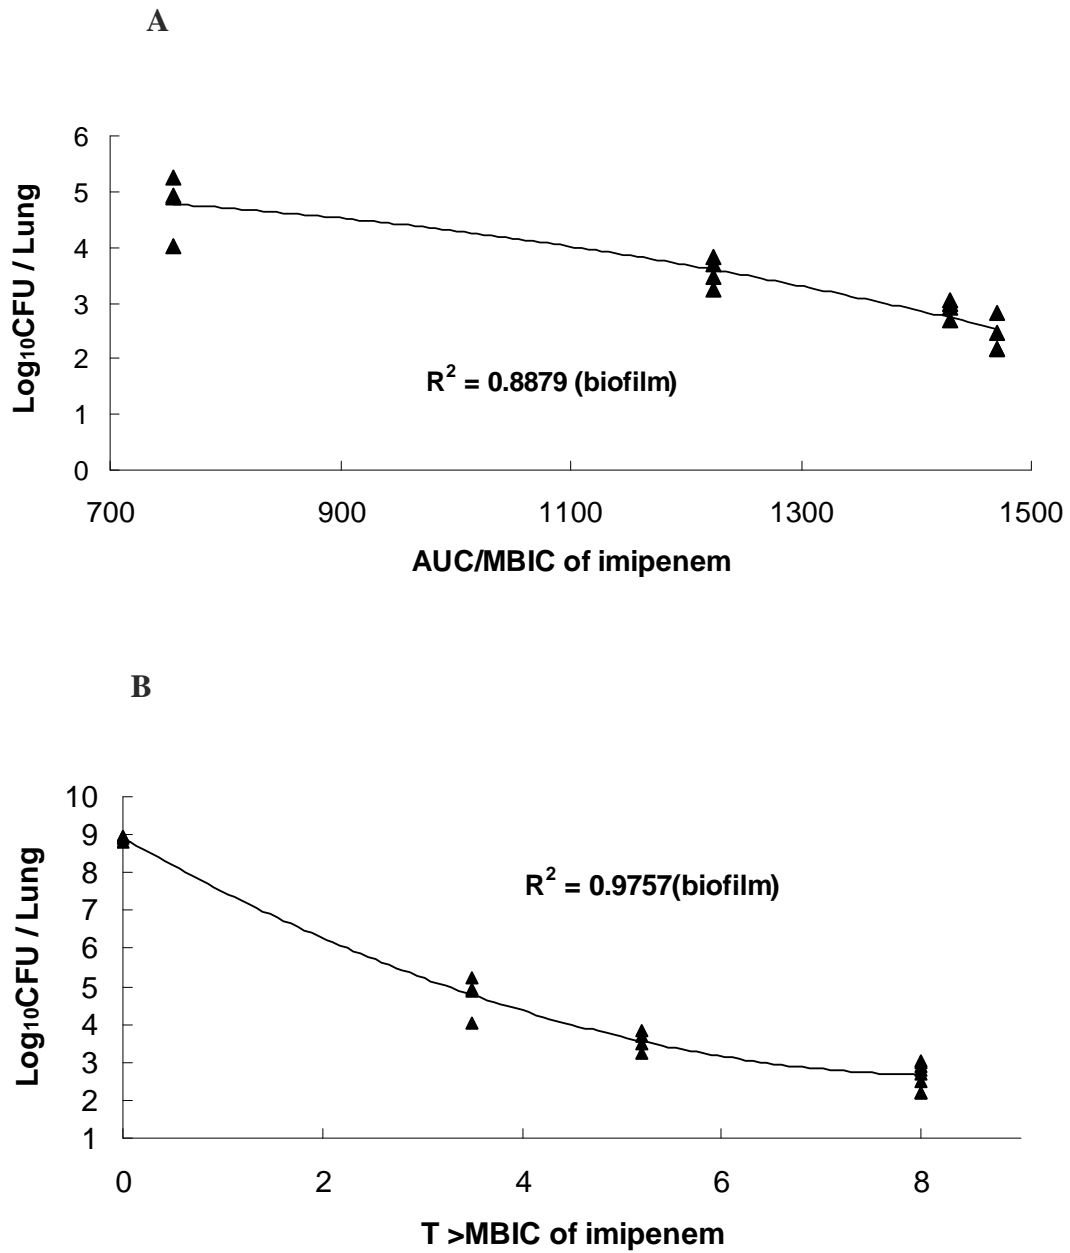

Fig.1 Relationships for *P. aeruginosa* between the log<sub>10</sub>CFU per lung and PK/PD indices AUC/MBIC (A) and T>MBIC (B) of imipenem. Each symbol represents the data from a single lung.

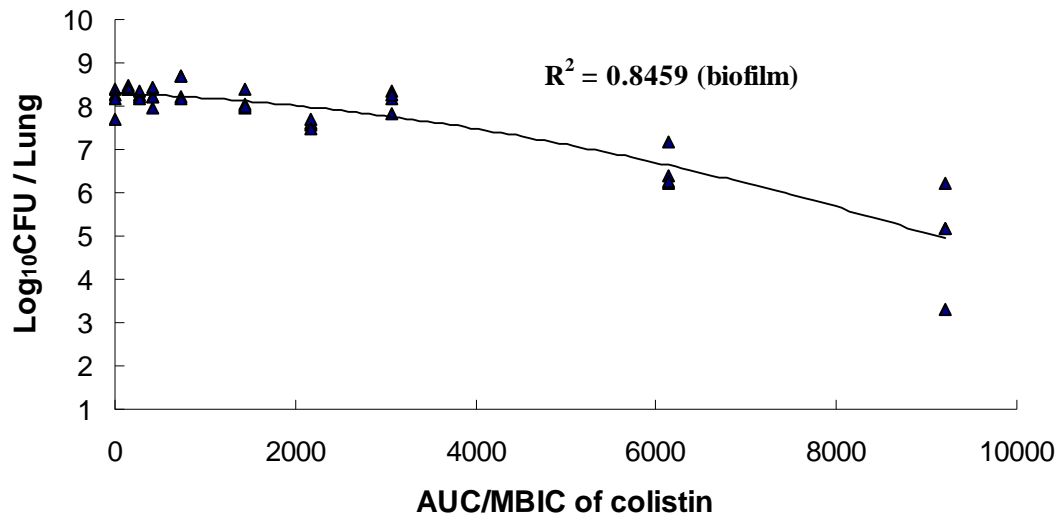

Fig.2 Relationships for *P. aeruginosa* between the log<sub>10</sub>CFU per lung and PK/PD index AUC/MBIC of colistin. Each symbol represents the data from a single lung.
